# Supplementary material for: Belonging and Social Integration as Factors of Well-Being in Latin America and Latin Europe Organizations
Source: Frontiers journal article supplement (doi:10.3389/fpsyg.2020.604412), 2020-12-09
Supplement: Table_1.pdf [file Table_1.pdf]

Belonging and Social Integration as Factors of Well-Being in Latin America and Latin Europe Organizations

Frontiers of Psychology

**Silvia da Costa<sup>1\*</sup>, Edurne Martínez-Moreno<sup>1</sup>, Virginia Díaz<sup>1</sup>, Daniel Hermosilla<sup>1</sup>, Alberto Amutio<sup>2</sup>, Sonia Padoan<sup>1</sup>, Doris Méndez<sup>4</sup>, Gabriela Etchebehere<sup>5</sup>, Alejandro Torres<sup>6</sup>, Saioa Telletxea<sup>3</sup> and Silvia García Mazzieri<sup>7</sup>**

<sup>1</sup>Department of Social Psychology, Faculty of Psychology, University of the Basque Country, San Sebastian, Spain

<sup>2</sup>Department of Social Psychology, Faculty of Labour Relations and Social Work, University of the Basque Country, Leioa, Spain

<sup>3</sup>Department of Social Psychology, Faculty of Labour Relations and Social Work, University of the Basque Country, Vitoria, Spain

<sup>4</sup>Department of Psychology, Faculty of Psychology, University of Talca, Talca, Chile

<sup>5</sup>Institute of Psychology, Education and Human Development, Faculty of Psychology, University of the Oriental Republic of Uruguay, Montevideo, Uruguay

<sup>6</sup>Argentine National Defense University, Argentina

<sup>7</sup>Department of Psychology, Regional Faculty of the National Technological University, Trenque Lauquen, Argentina

Corresponding author: Silvia da Costa e-mail: [silviacristina.dacosta@ehu.eus](mailto:silviacristina.dacosta@ehu.eus)

**Online Resource 1.** List of abbreviations or acronyms used in the paper or in the online resources

|       |                                                                                    |
|-------|------------------------------------------------------------------------------------|
| ACBC  | Autonomous Community of the Basque Country                                         |
| AHWB  | Affective hedonic view of subjective Well-Being                                    |
| AM    | Agreement with the methodology in the workplace                                    |
| BSCs  | Behavioral, somatic and cognitive reactions to stress                              |
| CSO   | Culture and organizational structure that reinforces participation and integration |
| CWa   | Control over work, role autonomy                                                   |
| DV    | Dependent variable                                                                 |
| EC    | Emotional Creativity                                                               |
| EMPW  | Empowerment                                                                        |
| EPs   | Excess of psychological demands at work or work stress                             |
| EPWB  | Eudaimonic vision or psychological Well-Being and personal optimal development     |
| EWB   | Eudaimonico Well-Being                                                             |
| GHWB  | Group hedonic Well-Being                                                           |
| ICT   | Information and communication technology                                           |
| IPaCG | Internal participation and communication in the group                              |
| IS    | Intention to stay                                                                  |
| ILO   | International Labor Organization                                                   |
| KPW   | Degree of knowledge and previous participation in work teams                       |
| LR    | Labor Role                                                                         |
| LpB   | Leadership that reinforces participation and belonging                             |
| LpO   | Organizational leadership that reinforces participation and belonging              |
| LeR   | Emotional Labor role                                                               |
| MS    | Military sample                                                                    |
| MV    | Motivational values                                                                |
| OC    | Organisational culture                                                             |
| OS    | Organisational structure                                                           |
| OVC   | Openness to change values                                                          |
| QLLH  | Quality of Life linked to health                                                   |
| SL    | Shared leadership                                                                  |
| SO    | Seniority in the organization                                                      |
| PWB   | Psychological or Eudaimonic Well-Being                                             |
| SHWB  | Subjective or Hedonic Well-Being                                                   |
| SWB   | Social Well-Being                                                                  |
| SWL   | Cognitive hedonic view of subjective Well-Being or satisfaction with life          |
| TL    | Transformational Leadership                                                        |
| TOaCE | Task orientation, and climate of excellence                                        |
| TV    | Transcendences values                                                              |
| TVB   | Values of transcendence Benevolence                                                |
| TVU   | Values of transcendence Universalism                                               |
| WS    | Workers sample                                                                     |
