# Supplementary material for: Belonging and Social Integration as Factors of Well-Being in Latin America and Latin Europe Organizations
Source: Frontiers journal article supplement (doi:10.3389/fpsyg.2020.604412), 2020-12-09
Supplement: Table_5.pdf [file Table_5.pdf]

Belonging and Social Integration as Factors of Well-Being in Latin America and Latin Europe Organizations

Frontiers of Psychology

**Silvia da Costa<sup>1\*</sup>, Edurne Martínez-Moreno<sup>1</sup>, Virginia Díaz<sup>1</sup>, Daniel Hermosilla<sup>1</sup>, Alberto Amutio<sup>2</sup>, Sonia Padoan<sup>1</sup>, Doris Méndez<sup>4</sup>, Gabriela Etchebehere<sup>5</sup>, Alejandro Torres<sup>6</sup>, Saioa Telletxea<sup>3</sup> and Silvia García Mazzieri<sup>7</sup>**

<sup>1</sup>Department of Social Psychology, Faculty of Psychology, University of the Basque Country, San Sebastian, Spain

<sup>2</sup>Department of Social Psychology, Faculty of Labour Relations and Social Work, University of the Basque Country, Leioa, Spain

<sup>3</sup>Department of Social Psychology, Faculty of Labour Relations and Social Work, University of the Basque Country, Vitoria, Spain

<sup>4</sup>Department of Psychology, Faculty of Psychology, University of Talca, Talca, Chile

<sup>5</sup>Institute of Psychology, Education and Human Development, Faculty of Psychology, University of the Oriental Republic of Uruguay, Montevideo, Uruguay

<sup>6</sup>Argentine National Defense University, Argentina

<sup>7</sup>Department of Psychology, Regional Faculty of the National Technological University, Trenque Lauquen, Argentina

Corresponding author: Silvia da Costa e-mail: [silviacristina.dacosta@ehu.eus](mailto:silviacristina.dacosta@ehu.eus)

**On line resources 5**, Sociodemographic data of the participating sample by country in **study 2**. The variables used specifically in this study are marked in gray.

Socio-demographic variables Group 1 (Talca)

| Sample                   | Age                                                     | Sex<br>Biserial point<br>1 = men, 2 = women      | Civil State                                                        | Children (YES) | Besides working, do you study? (YES) | Level of study                               | Current sector<br>Education<br>Social Intervention | Years in the sector                   | Job role (At the time of the survey)                                                             | Current medical leave or sick leave                              | Time in your organization (at the time of the survey, 2014) | Type of contract                                                  | Agreement with the methodology                                                                | Intention of permanence (in the organization in the long term) YES |
|--------------------------|---------------------------------------------------------|--------------------------------------------------|--------------------------------------------------------------------|----------------|--------------------------------------|----------------------------------------------|----------------------------------------------------|---------------------------------------|--------------------------------------------------------------------------------------------------|------------------------------------------------------------------|-------------------------------------------------------------|-------------------------------------------------------------------|-----------------------------------------------------------------------------------------------|--------------------------------------------------------------------|
| CHILE<br>Talca<br>School | 23 to 61 years<br><i>M</i> = 39,14<br><i>DT</i> = 10,23 | <i>M</i> = 1,75<br><i>DT</i> = .439<br>75% women | 51.4% single,<br>40.5% married,<br>2.7% divorced<br>; 5.4% widowed | 60%            | 82%                                  | 83% Graduate,<br>8.7% Master/Master's Degree | Educational                                        | <i>M</i> = 11,30<br><i>DT</i> = 10,16 | 13.5% management position, 73% professor,<br>11.7% educational assistant,<br>2.7% administrative | 67% due to physical illness,<br>33.3% due to occupational stress | 30% < 10 years                                              | 59.5% permanent position,<br>37.8% indefinite,<br>2.7% substitute | 59.5% agree,<br>24.3% somewhat agree, 8.1% total agree,<br>5.4% do not agree, 2.7% very agree | 57,8%                                                              |
