# Supplementary material for: Belonging and Social Integration as Factors of Well-Being in Latin America and Latin Europe Organizations
Source: Frontiers journal article supplement (doi:10.3389/fpsyg.2020.604412), 2020-12-09
Supplement: Table_6.pdf [file Table_6.pdf]

Belonging and Social Integration as Factors of Well-Being in Latin America and Latin Europe Organizations

Frontiers of Psychology

**Silvia da Costa<sup>1\*</sup>, Edurne Martínez-Moreno<sup>1</sup>, Virginia Díaz<sup>1</sup>, Daniel Hermosilla<sup>1</sup>, Alberto Amutio<sup>2</sup>, Sonia Padoan<sup>1</sup>, Doris Méndez<sup>4</sup>, Gabriela Etchebehere<sup>5</sup>, Alejandro Torres<sup>6</sup>, Saioa Telletxea<sup>3</sup> and Silvia García Mazzieri<sup>7</sup>**

<sup>1</sup>Department of Social Psychology, Faculty of Psychology, University of the Basque Country, San Sebastian, Spain

<sup>2</sup>Department of Social Psychology, Faculty of Labour Relations and Social Work, University of the Basque Country, Leioa, Spain

<sup>3</sup>Department of Social Psychology, Faculty of Labour Relations and Social Work, University of the Basque Country, Vitoria, Spain

<sup>4</sup>Department of Psychology, Faculty of Psychology, University of Talca, Talca, Chile

<sup>5</sup>Institute of Psychology, Education and Human Development, Faculty of Psychology, University of the Oriental Republic of Uruguay, Montevideo, Uruguay

<sup>6</sup>Argentine National Defense University, Argentina

<sup>7</sup>Department of Psychology, Regional Faculty of the National Technological University, Trenque Lauquen, Argentina

Corresponding author: Silvia da Costa e-mail: [silviacristina.dacosta@ehu.eus](mailto:silviacristina.dacosta@ehu.eus)

**On line resources 6**, general and specific socio-demographic data by country participating in the **study 3**. The variables used specifically in this study are marked in gray and in **bold relief**.

### General socio-demographic

| Sample                     | Sex                                                               | Age                                    | Educational Level                                                                                                     | Relevant data on members and the organisation                                                                                                                                                                                                                                                                                                                                                                                                                                                                                                                                                                                                                                                                                                                                                                                                                                                                                                                                                                                                                                                  |
|----------------------------|-------------------------------------------------------------------|----------------------------------------|-----------------------------------------------------------------------------------------------------------------------|------------------------------------------------------------------------------------------------------------------------------------------------------------------------------------------------------------------------------------------------------------------------------------------------------------------------------------------------------------------------------------------------------------------------------------------------------------------------------------------------------------------------------------------------------------------------------------------------------------------------------------------------------------------------------------------------------------------------------------------------------------------------------------------------------------------------------------------------------------------------------------------------------------------------------------------------------------------------------------------------------------------------------------------------------------------------------------------------|
| Workers<br><i>N</i> = 683  | 50,9% men;<br>49,1 women<br><i>M</i> = 1.49, <i>DT</i><br>= .500  | <i>M</i> = 36,27,<br><i>DT</i> = 10,70 | 79% tertiary                                                                                                          | > 500 employees (60.1%); between 10 and 50 (20.5%) Civil service (56.5%), private (41.2%), third sector (2.4%). Service sector (78.1%), Industrial (15.2%), Agricultural (5.7%), <1% transport, commercial aviation, other. <b>Seniority &gt;10 years in the current organization (27.8%), &gt; 6 months and up to 2 years (21.5%). Permanent contract (74%)</b> . Worked in two or more departments (56%) and held two or more positions during working life (55%). Worked continuously (66.7%), from Monday to Saturday (15.7%). From Monday to Friday (57.8%). Fixed salary (78.1%), a fixed part and a variable part (17.1%). Has not been promoted in category/position or professional group since joining the organisation (51.6%). The work that he does corresponds to the professional category/position in the ladder (58.1%); his work is above what is recognized in the salary (30.8%), it is below (4%), he does not know (5.5%). Their work is well paid (71.4%). He does not hold a management position (76.6%), yes (23.4%). Has been on sick leave in the last year (56.8%) |
| Military<br><i>N</i> = 315 | 85,7% men;<br>12,1% women<br><i>M</i> = 1.12, <i>DT</i><br>= 3.29 | <i>M</i> = 23.52,<br><i>DT</i> = 2.39  | 3rd and 4th year students (50 and 50) of a Military Academy, in positions of leadership in relation to other students | Arsenals 13% ( <i>n</i> = 36); Quartermasters 7% ( <i>n</i> =21); Infantry 31% ( <i>n</i> = 89) ; Artillery 13% ( <i>n</i> = 13) ; Communications 12% ( <i>n</i> = 35) ; Engineering 12% ( <i>n</i> = 33) ; Cavalry 11% ( <i>n</i> = 31)                                                                                                                                                                                                                                                                                                                                                                                                                                                                                                                                                                                                                                                                                                                                                                                                                                                       |

## Socio-demographic variables by country

| Sample                                       | Sex                           | Age                                   | Educational Level                                    | Relevant data on members and the organisation                                                                                                                                                                                                                                                                                                                                                                                                                                                                                                                                                                                                                                                                                                                                                                                                                                                                                                                                                                                                                                                             |
|----------------------------------------------|-------------------------------|---------------------------------------|------------------------------------------------------|-----------------------------------------------------------------------------------------------------------------------------------------------------------------------------------------------------------------------------------------------------------------------------------------------------------------------------------------------------------------------------------------------------------------------------------------------------------------------------------------------------------------------------------------------------------------------------------------------------------------------------------------------------------------------------------------------------------------------------------------------------------------------------------------------------------------------------------------------------------------------------------------------------------------------------------------------------------------------------------------------------------------------------------------------------------------------------------------------------------|
| Argentina<br><br>N = 50                      | M = 1,34, DT = 1,479 66% men  | 22 to 53 years, M = 29,92, DT = 7,395 | 66% up to tertiary education, 34% tertiary education | > 11 to 50 employees (46%), up to 10 (36%), 101 to 500 (18%). Private function (90%), public (8%), third sector (2%). Agricultural sector (92%), service (8%). <b>Seniority &gt; 2 and up to 5 years (34%), between one month and up to 6 months (22%), &gt; 6 months and up to 2 years (18%), &gt; 5 and up to 10 years, more than 10 years (10%), less than 30 days (6%). Fixed contract (80%).</b> Worked in two or more departments and occupied two or more positions during your working life (90% NOT respectively). Working day from Monday to Saturday (80%), from Monday to Friday (14%). Fixed salary (62%), a fixed part and a variable part (34%). Not promoted in category/position or professional group since joining the organization (78%). The work you do corresponds to the professional category/position in the ladder (64%); your work is above what is recognised in your salary (12%), it is below (4%), you do not know it (6%). Their work is well paid (66%). He does not hold a management position (88%), yes (12%). You have been on sick leave in the last year (74% NO) |
| Brazil<br><br>N = 316                        | M = 1.69, SD = .490 60% women | 18 a 75 years, M = 35,36, SD = 9,996  | 81% tertiary education                               | <500 employees (43.2), 101 to 500 (28%), 11 to 50 (13.6), 51 to 100 and up to 10 <8%. Private function (71%), public (25%), third sector (5%). Service sector (66%), industry (31%), agriculture (3%). <b>Seniority &gt;6 months and up to 2 years (27%), &gt;2 years and up to 5 years (25%), &gt;5 years and up to 10 years (20%), &gt;10 years (18%), &lt;1 month and up to 6 months (9%), &lt;30 days (2%). Permanent contract (76%).</b> Worked in two or more departments and held two or more positions during their working life (73% YES). Continuous working day from Monday to Friday (66%). Fixed salary (81%). Was promoted in category/position or professional group since joining the organization (89%). The work you do corresponds to the professional category/position in the ladder (52%), is above what is recognised in your salary (38.5%), is below (2.9%), does not know (6.6%). His work is well paid (83%). He does not hold a management position (62%), not (38%). Has been on sick leave during the last year (71% YES)                                                   |
| Experts:<br>Chile and<br>Spain<br><br>N = 15 | M = 1,33, SD = .488 67% men   | 23 to 66 years, M = 42,20, SD = 11,55 | 100% tertiary education                              | Up to 10 employees (44.4%), >500 (33.3%). Private function (92%). Service sector (67%), agriculture (n = 2), commercial aviation (n = 1). <b>Seniority &gt; 2 and up to 5 years (49%), &gt;10 years (30%), &gt; 5 and up to 10 years (20%), &gt;6 months and up to 2 years (10%). Fixed contract (80%).</b> Worked in two or more departments (56% YES) and occupied two or more positions during their working life (62% NO). Continuous working day from Monday to Friday (45.5%); exceptionally Saturday, Sunday and public holidays (36.4%), from Monday to Saturday (18%). Fixed salary                                                                                                                                                                                                                                                                                                                                                                                                                                                                                                              |

|                   |                                |                                         |                        |                                                                                                                                                                                                                                                                                                                                                                                                                                                                                                                                                                                                                                                                                                                                                                                                                                                                                                                                                                                                                                                                                                                 |
|-------------------|--------------------------------|-----------------------------------------|------------------------|-----------------------------------------------------------------------------------------------------------------------------------------------------------------------------------------------------------------------------------------------------------------------------------------------------------------------------------------------------------------------------------------------------------------------------------------------------------------------------------------------------------------------------------------------------------------------------------------------------------------------------------------------------------------------------------------------------------------------------------------------------------------------------------------------------------------------------------------------------------------------------------------------------------------------------------------------------------------------------------------------------------------------------------------------------------------------------------------------------------------|
|                   |                                |                                         |                        | (66.7%); fixed part/variable part (33.3%). Was promoted from category/position or professional group since joining the organisation (56% NO). Was promoted in category/position or professional group since joining the organization (56% NO). The work you do corresponds to the professional category/position in the ladder (89%), is above what is recognised in your salary (n = 1). Your work is well paid (78%). You do not hold a management position (78%), no (22%). You have been on sick leave in the last year (67% NO)                                                                                                                                                                                                                                                                                                                                                                                                                                                                                                                                                                            |
| Spain<br>N = 269  | M = 1,46, SD = .500<br>54% men | 24 to 67 years<br>M = 43,35, SD = 11,05 | 99% tertiary education | >500 employees (55.5%), from 51 to 100 (20%), from 101 to 500 (12%) and up to 10 (4.5%) Public service (63.4%), private (36.6%). Service sector (94%), industry (6%). <b>Seniority &gt;10 years (51%), &gt;2 years and up to 5 years (19%), &gt;5 years and up to 10 years (13%), &gt;6 months and up to 2 years (10%), &lt;30 days (7%). Permanent contract (62%), temporary (33%).</b> Worked in two or more departments and occupied two or more positions during their working life (64% and 66% NOT respectively). Continuous working day from Monday to Friday (60%), exceptionally Saturdays, Sundays and public holidays (24%). Fixed salary (85%). Has been promoted in category/position or professional group since joining the organization (61%). The work you do corresponds to the professional category/position in the ladder (66%), is above what is recognised in your salary (23%), is below (7.5%), does not know (3.8%). His work is well paid (53% NO). He does not hold any management position (79% NO). You have been on sick leave during the last year (56% NO)                     |
| Mexico<br>N = 135 | M = 1.41, SD = .493<br>59% men | 18 to 57 years, M = 32,40, SD = 8,28    | 62% tertiary education | > 11 to 50 employees (41.5%), >500 employees (24.4%), 101 to 500 (23%), up to 10 (6.7%), 51 to 100 (4.4%) Private function (70%), public (24.4%), third sector (5.2%). Service sector (48.9%), industry (45.2%), >1% aviation transport and others. <b>Seniority &gt; 6 months and up to 2 years (32.6%), &gt; 2 and up to 5 years (32%), between 1 month and up to 6 months (15.6%), &gt; 5 and up to 10 years (10.4%), more than 10 years (9.6%). Permanent contract (83%).</b> Worked in two or more departments and occupied two or more positions during their working life (50% NOT respectively). Working day from Monday to Saturday (50%), from Monday to Friday (50%). Fixed salary (50%), a fixed part and a variable part (50%). You have not been promoted in any category/position or professional group since you joined the organization (50% NO). The work you do corresponds to the professional category/position in the ladder (100% YES). Your work is well paid (50%). You do not hold a management position (88%), yes (12%). You have been on sick leave during the last year (100% NO) |
