# Supplementary material for: Belonging and Social Integration as Factors of Well-Being in Latin America and Latin Europe Organizations
Source: Frontiers journal article supplement (doi:10.3389/fpsyg.2020.604412), 2020-12-09
Supplement: Table_7.pdf [file Table_7.pdf]

Belonging and Social Integration as Factors of Well-Being in Latin America and Latin Europe Organizations

Frontiers of Psychology

**Silvia da Costa<sup>1\*</sup>, Edurne Martínez-Moreno<sup>1</sup>, Virginia Díaz<sup>1</sup>, Daniel Hermosilla<sup>1</sup>, Alberto Amutio<sup>2</sup>, Sonia Padoan<sup>1</sup>, Doris Méndez<sup>4</sup>, Gabriela Etchebehere<sup>5</sup>, Alejandro Torres<sup>6</sup>, Saioa Telletxea<sup>3</sup> and Silvia García Mazzieri<sup>7</sup>**

<sup>1</sup>Department of Social Psychology, Faculty of Psychology, University of the Basque Country, San Sebastian, Spain

<sup>2</sup>Department of Social Psychology, Faculty of Labour Relations and Social Work, University of the Basque Country, Leioa, Spain

<sup>3</sup>Department of Social Psychology, Faculty of Labour Relations and Social Work, University of the Basque Country, Vitoria, Spain

<sup>4</sup>Department of Psychology, Faculty of Psychology, University of Talca, Talca, Chile

<sup>5</sup>Institute of Psychology, Education and Human Development, Faculty of Psychology, University of the Oriental Republic of Uruguay, Montevideo, Uruguay

<sup>6</sup>Argentine National Defense University, Argentina

<sup>7</sup>Department of Psychology, Regional Faculty of the National Technological University, Trenque Lauquen, Argentina

Corresponding author: Silvia da Costa e-mail: [silviacristina.dacosta@ehu.eus](mailto:silviacristina.dacosta@ehu.eus)

**On line resources 7**, Sociodemographic data of the participating sample by country in **study 4**. The variables used specifically in this study are marked in gray.

### Socio-demographic variables

| -     | Age<br>(years)                                             | Sex<br>Biserial point<br>1 = men, 2 = women                | Level of study                                                                                                                                                                                    | Current sector                                                                  | Job role<br>At the time of the survey                                                                                     | Time in the organization                                                                                                                     |
|-------|------------------------------------------------------------|------------------------------------------------------------|---------------------------------------------------------------------------------------------------------------------------------------------------------------------------------------------------|---------------------------------------------------------------------------------|---------------------------------------------------------------------------------------------------------------------------|----------------------------------------------------------------------------------------------------------------------------------------------|
| Spain | 22 to 59 years<br><br><i>M</i> = 35.88<br><i>SD</i> = 9.15 | 63.4% ( <i>n</i> = 52) women<br>36.6% ( <i>n</i> = 30) men | University studies 67% ( <i>n</i> = 55)<br>Senior technician 12% ( <i>n</i> = 10)<br>Average technician 11% ( <i>n</i> = 9)<br>PhD 8.5% ( <i>n</i> = 7)<br>Primary education 1.2% ( <i>n</i> = 1) | Service sector 51.2% ( <i>k</i> = 5)<br>Production sector 48.8% ( <i>k</i> = 3) | Basic workers 53.8% ( <i>n</i> = 43)<br>Middle management 35.0% ( <i>n</i> = 28)<br>Management team 11.3% ( <i>n</i> = 9) | < 5 years 37.8% ( <i>n</i> = 31)<br>6-15 years 42.7% ( <i>n</i> = 35)<br>16-25 years 11.0% ( <i>n</i> = 9)<br>>26 years 8.5% ( <i>n</i> = 7) |
